# Supplementary material for: Multifunctional Nanoparticles as High-Efficient Targeted Hypericin System for Theranostic Melanoma
Source: MDPI journal article supplement (doi:10.3390/polym15010179), 2022-12-30

## Supporting Information

### Multifunctional nanoparticles as high-efficient targeted hypericin system for theranostic melanoma

Flávia Amanda Pedroso de Moraes <sup>1,2\*</sup>, Ana Carolina Vieira de Oliveira<sup>2</sup>, Rodolfo Bento Balbinot <sup>1</sup>, Danielle Lazarin-Bidóia <sup>1</sup>, Tânia Ueda-Nakamura <sup>1</sup>, Sueli de Oliveira Silva <sup>1</sup>, Katieli da Silva Souza Campanholi <sup>2</sup>, Ranulfo Combuca da Silva Junior <sup>2</sup>; Renato Sonchini Gonçalves <sup>3</sup>; Wilker Caetano <sup>2</sup>; Celso Vataru Nakamura <sup>1\*</sup>.

<sup>1</sup> *Technological Innovation Laboratory in the Pharmaceuticals and Cosmetics Development, State University of Maringá, 87020-900 Maringá - PR, Brazil.*

<sup>2</sup> *Department of Chemistry, State University of Maringá, 87020-900 Maringá - PR, Brazil.*

<sup>3</sup> *Laboratory of Chemistry of Natural Products, Department of Chemistry, Center for Exact Sciences and Technology, Federal University of Maranhão, São Luís 65080-805, MA, Brazil.*

\* Correspondence: flaviaapmoraes@hotmail.com (F.A.P.d.M.); cvnakamura@uem.br (C.V.N); Tel.: +55 (44) 3011-3680 (F.A.P.d.M. & C.V.N).

**Supplementary Material 01.**  $^1\text{H}$  NMR spectra of F127-BT copolymer in  $\text{D}_2\text{O}$  at  $25^\circ\text{C}$  and 300 MHz.

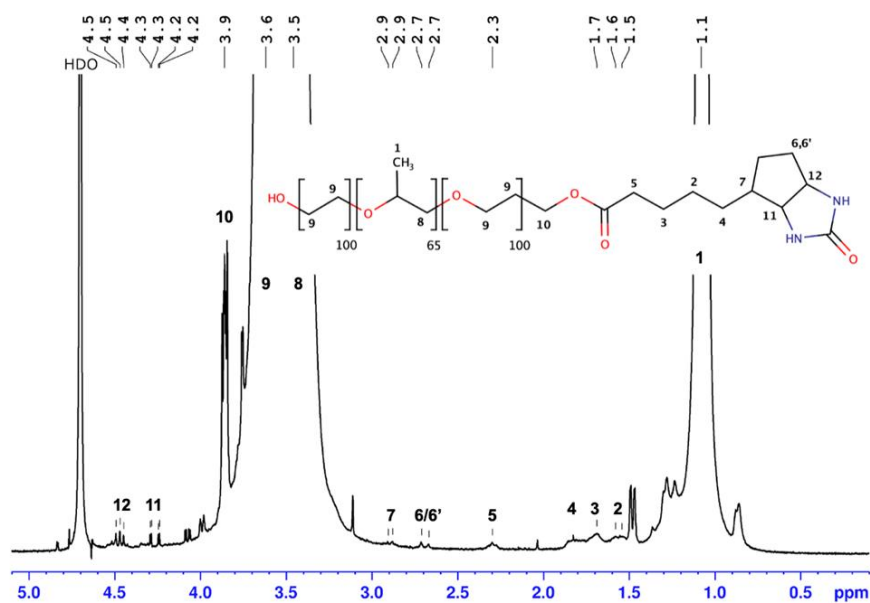

**Supplementary Material 02.**  $^1\text{H}$  NMR spectra of F127-COOH copolymer in  $\text{D}_2\text{O}$  at 25  $^\circ\text{C}$  and 300 MHz.

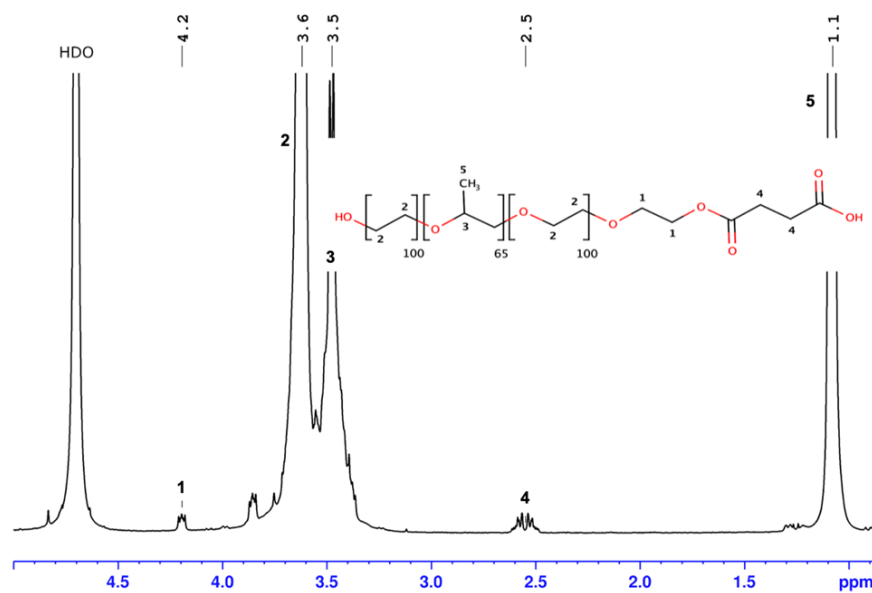

**Supplementary Material 03.**  $^1\text{H}$  NMR spectra of F127 copolymer in  $\text{D}_2\text{O}$  at 25  $^\circ\text{C}$  and 300 MHz.

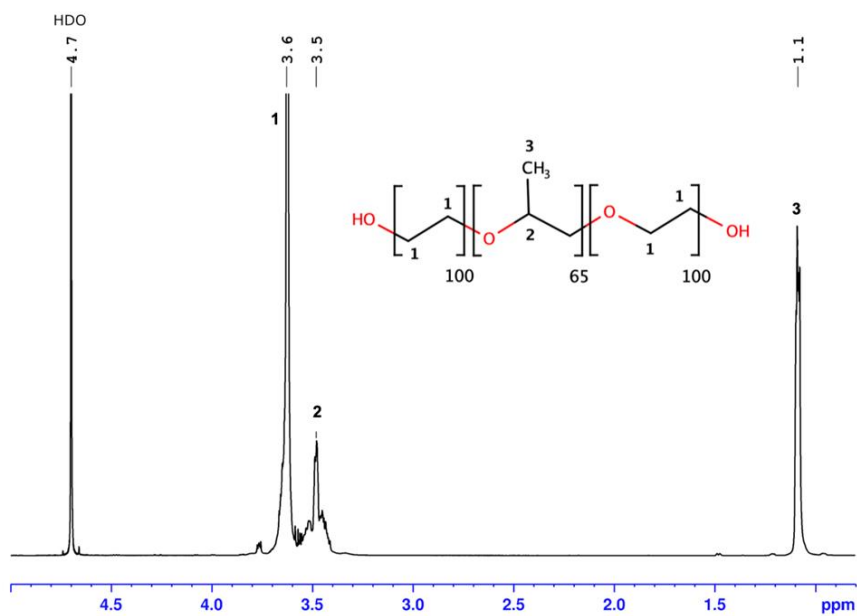

**Supplementary Material 04.**  $^1\text{H}$  NMR spectra of F127-SN copolymer in  $\text{D}_2\text{O}$  at 25 °C and 300 MHz.

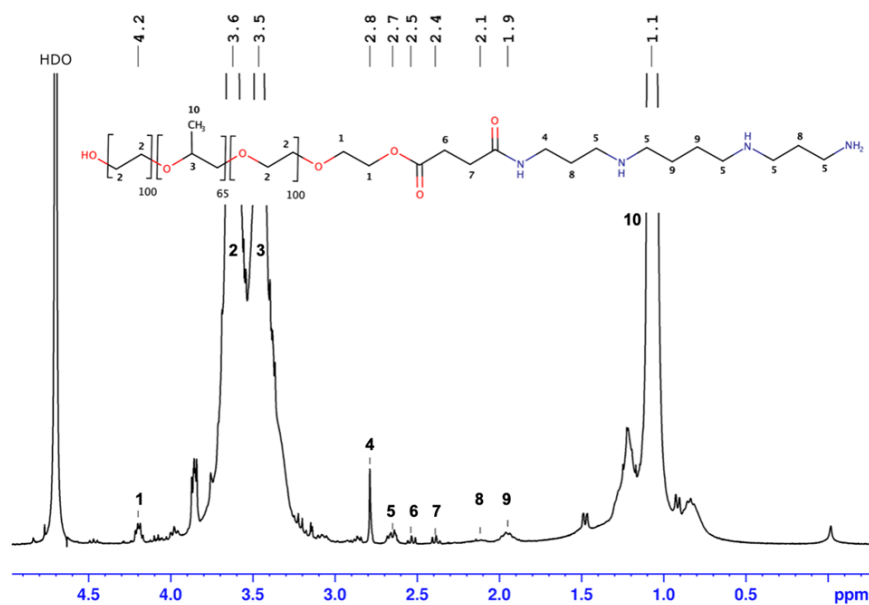

**Supplementary Material 05.**  $^1\text{H}$  NMR spectrum of FA acquired in DMSO- $d_5$  at 300 MHz and 25  $^\circ\text{C}$ .

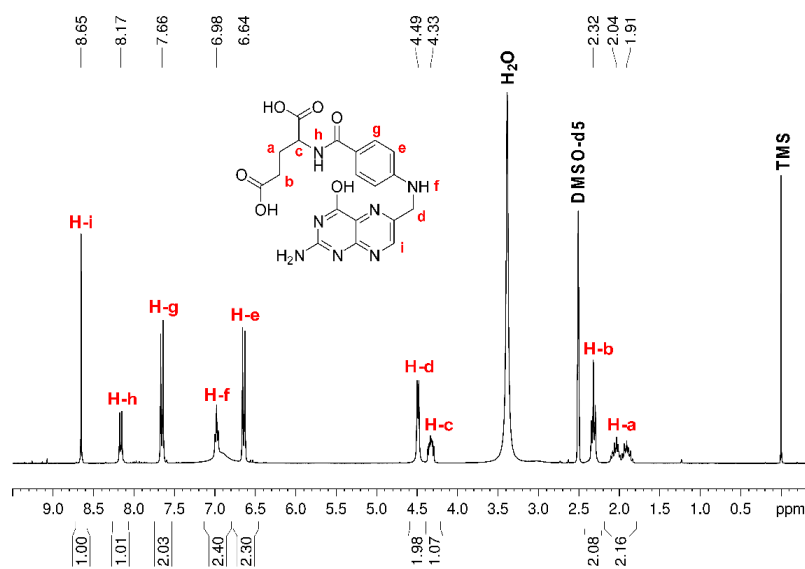

**Supplementary Material 06.**  $^1\text{H}$  NMR spectra of F127-FA copolymer in  $\text{D}_2\text{O}$  at 25 °C and 300 MHz.

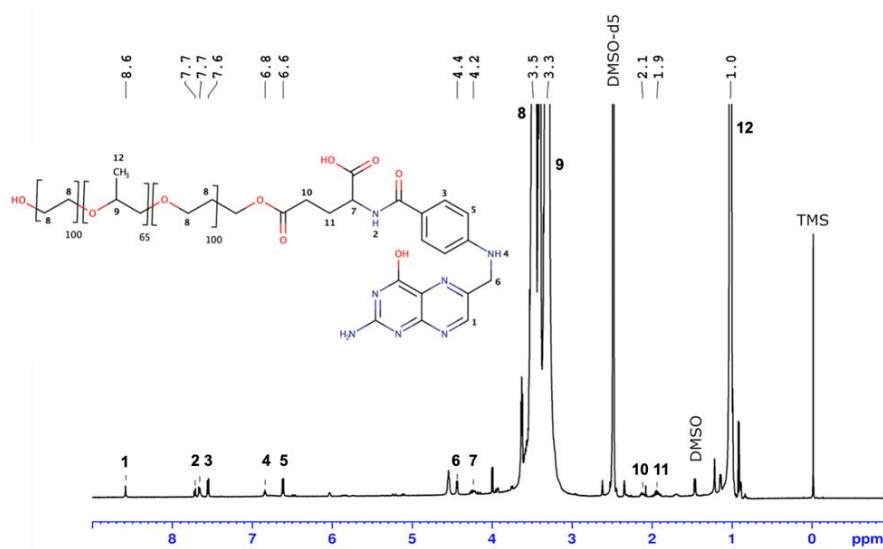

Supplement: s1 [file s1]
